# Supplementary material
Source: PubMed Central journal article supplement (PMC2096423)
Supplement: JCI0732301sd.pdf [file JCI0732301sd.pdf]

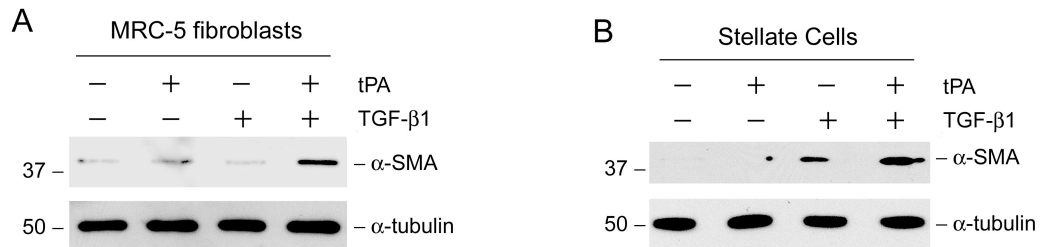

**Supplementary Figure 1.** tPA promotes the TGF- $\beta$ 1-mediated myofibroblastic activation of the matrix-producing cells in non-renal tissues. Human lung fibroblast cells (MRC-5) (**A**) and primary rat hepatic stellate cells (**B**) were treated with tPA ( $10^{-8}$  M) in the absence or presence of TGF- $\beta$ 1 (0.05 ng/ml) for 24 h. Cell lysates were subjected to Western blot analysis with antibodies against  $\alpha$ -SMA and  $\alpha$ -tubulin, respectively.
